# Supplementary material for: Human Sox4 facilitates the development of CXCL13-producing helper T cells in inflammatory environments
Source: PubMed Central journal article supplement (PMC6145936; doi:10.1038/s41467-018-06187-0), 2018-09-19
Supplement: 41467_2018_6187_MOESM1_ESM.pdf [file 41467_2018_6187_MOESM1_ESM.pdf]

**Supplementary Information for**

**Human Sox4 facilitates the development of CXCL13-producing helper T cells in inflammatory environments**

Yoshitomi et al.

## Supplementary Figures

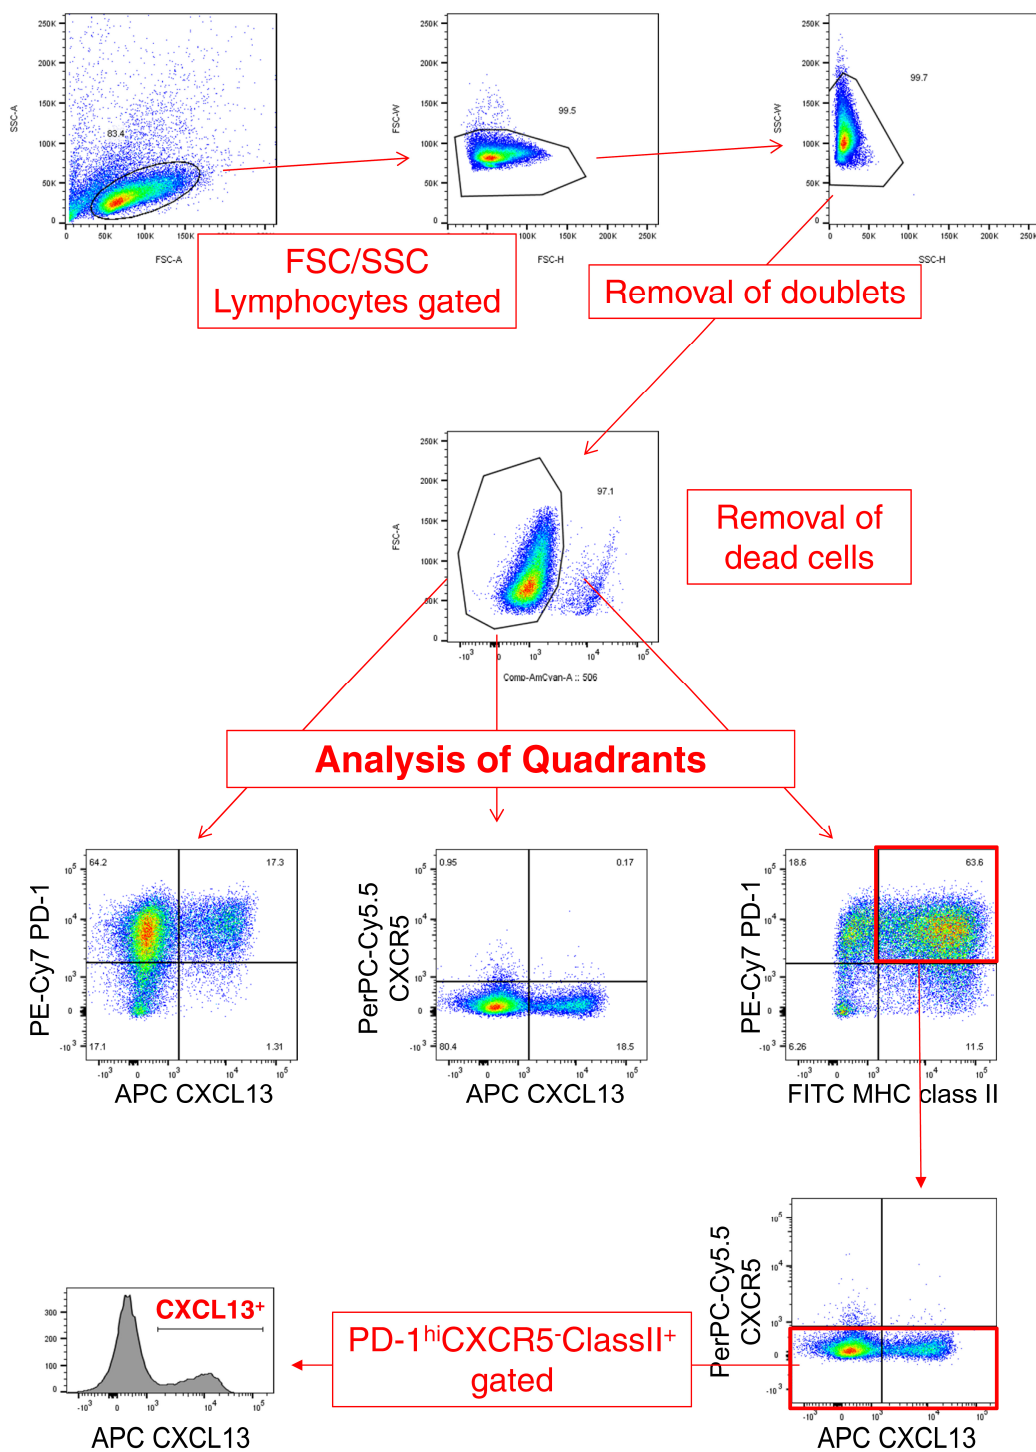

**Supplementary Figure 1.** Gating strategy of figure 1. Naive human CD4<sup>+</sup> T cells differentiated for 5 days were gated with FSC and SSC, followed by removal of doublet cells and dead cells. Percentages of quadrants were investigated. As for PD-1<sup>hi</sup>CXCR5<sup>+</sup>Class II<sup>+</sup> population, the frequency of CXCL13-positive cells in the population was investigated.

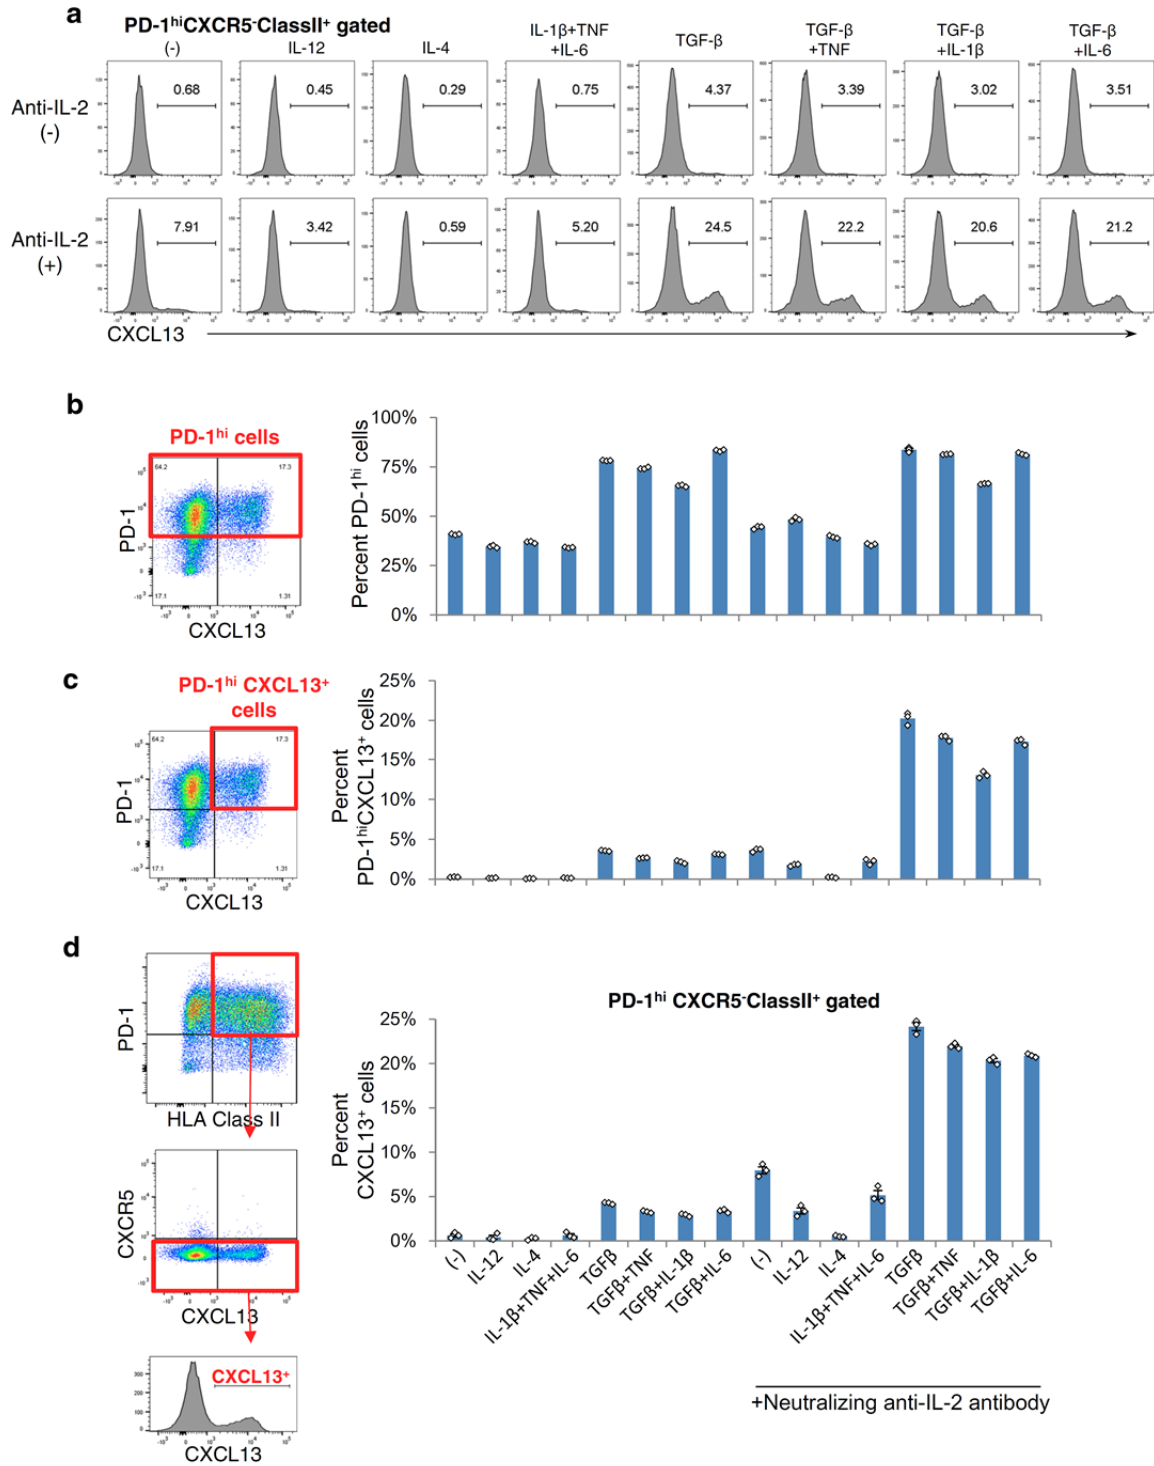

**Supplementary Figure 2.** Limiting of IL-2 upregulates CXCL13 production by PD-1<sup>hi</sup>CXCR5<sup>-</sup>ClassII<sup>+</sup> cells. **a-d** Human naïve CD4<sup>+</sup> T cells were differentiated as in figure 1. **a** Representative histograms showing frequency of CXCL13-positive cells in PD-1<sup>hi</sup>CXCR5<sup>-</sup>ClassII<sup>+</sup> cells. **b-d** Percent PD-1<sup>hi</sup> cells (**b**), percent PD-1<sup>hi</sup>CXCL13<sup>+</sup> cells (**c**), and percent CXCL13<sup>+</sup> cells in PD-1<sup>hi</sup>CXCR5<sup>-</sup>ClassII<sup>+</sup> cells (**d**) are shown as corresponding dots (n=3) and mean ± SEM with schematic definition of the populations.

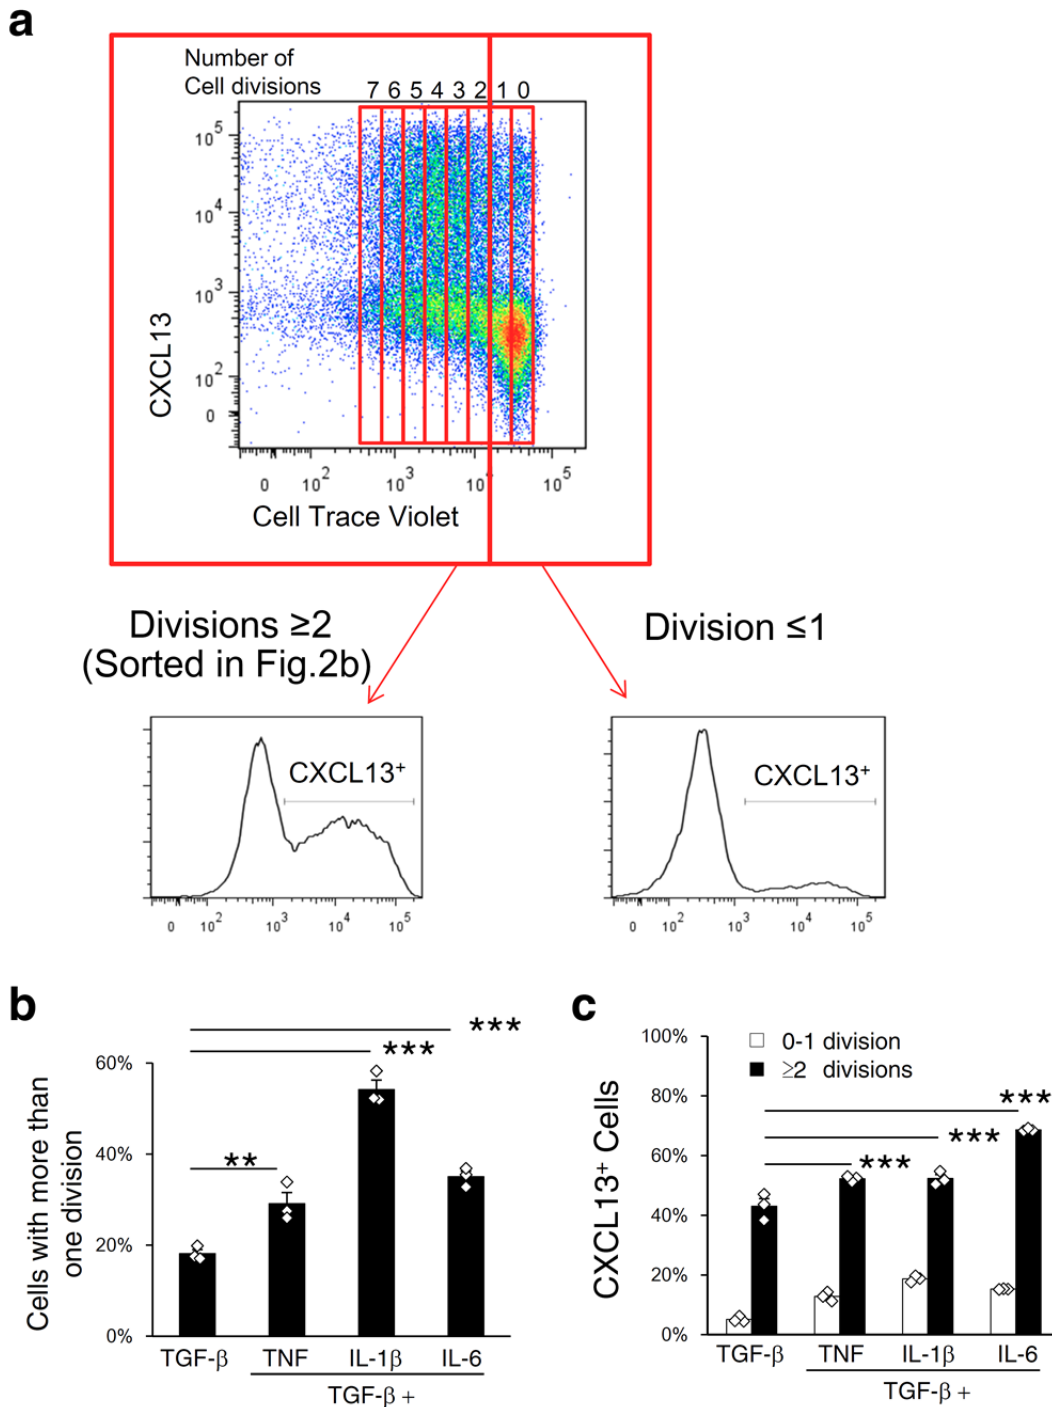

**Supplementary Figure 3.** Proinflammatory cytokines enhance cell proliferation and CXCL13 production. **a-c** Human blood CD4<sup>+</sup> T cells labeled with CellTrace™ Violet were stimulated with plate-bound 10  $\mu$ g/ml anti-CD3 and 10  $\mu$ g/ml anti-CD28 antibodies in the presence of 10  $\mu$ g/ml neutralizing anti-IL-2 antibody with TGF- $\beta$ 1 alone, TGF- $\beta$ 1 plus TNF, TGF- $\beta$ 1 plus IL-1 $\beta$ , and TGF- $\beta$ 1 plus IL-6 (each 10 ng/ml) for 5 days in serum-containing IMDM. **a** Schematic description of analysis. **b,c** Percentages of cells with more than one division in total cells (**b**), or percentages of CXCL13<sup>+</sup> cells in cells with 0-1 division or in cells with more than one division (**c**) are shown. Quantifications were shown as corresponding dots (n=3) and mean  $\pm$  SEM; \*\* $P$  < 0.01, and \*\*\* $P$  < 0.001 one-way ANOVA, Tukey test.

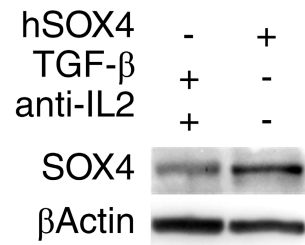

**Supplementary Figure 4.** Lentiviral induction of exogenous Sox4 protein in human CD4<sup>+</sup> T cells. Protein expression of Sox4 in human CD4<sup>+</sup> T cells cultured with TCR stimulation in the presence of TGF- $\beta$  stimulation and IL-2-neutralization or lentiviral transduction of human Sox4. Sox4-transduced human CD4<sup>+</sup> T cells were sorted as YFP<sup>+</sup> cells.

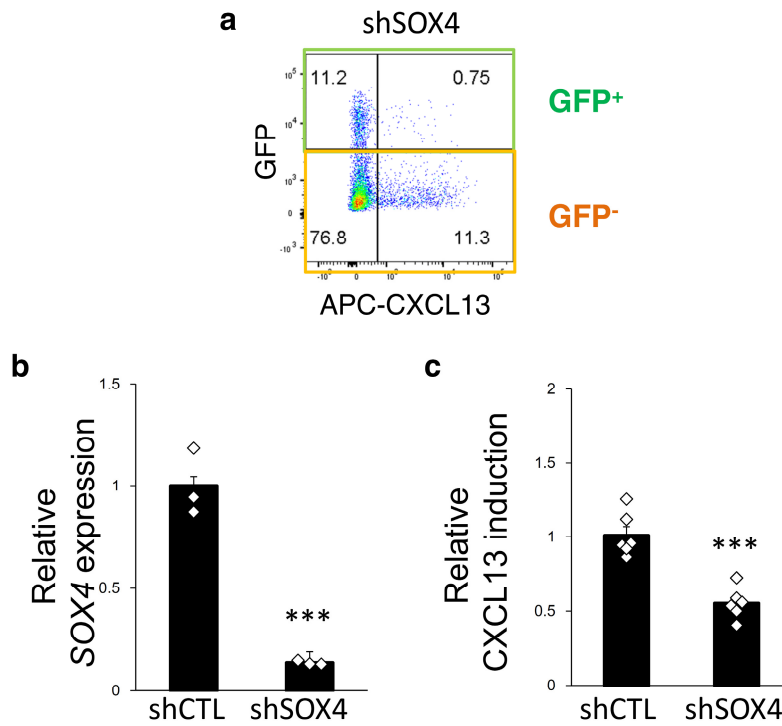

**Supplementary Figure 5.** Lentiviral knockdown of Sox4 significantly downregulated CXCL13 induction. **a-c** Naïve human CD4<sup>+</sup> T cells transduced with control or Sox4-specific shRNA by GFP-expressing lentivirus were differentiated in the presence of TGF- $\beta$ . **a** Schematic description of analysis with a representative dot plot. **b,c** mRNA expression of *Sox4* relative to *18srRNA* determined by quantitative PCR in sorted GFP<sup>+</sup> cells (**b**, n=3), and relative induction of cells positive for CXCL13 protein in GFP<sup>+</sup> cells compared with GFP<sup>-</sup> cells determined by flow cytometry (**c**, n=6 from two experiments) are shown. The data are presented as corresponding dots and mean  $\pm$  SEM. \*\*\* $P$  < 0.001 unpaired student's t test.

**Identity: 383 / 474 (80%)**  
**Similarity: 433 / 474 (91%)**

|            |     |                                                              |     |
|------------|-----|--------------------------------------------------------------|-----|
| Human Sox4 | 1   | MVQQTNNAENTEALLAGESSDSGAGLELGIASSPTPGSTASTGGKADDPWCKTPSGHIK  | 60  |
| Mouse Sox4 | 1   | MVQQTNNAENTEALLAGESSDSGAGLELGIASSPTPGSTASTGGKADDPWCKTPSGHIK  | 60  |
| Query      | 61  | RPMNAFMVWSQIERRKIMEQSPDMHNAEISKRLGKRWKLKDSKIPFIREAERLRKHM    | 120 |
| Sbjct      | 61  | RPMNAFMVWSQIERRKIMEQSPDMHNAEISKRLGKRWKLKDSKIPFIREAERLRKHM    | 120 |
| Query      | 121 | ADYPDYKYRPRKKVKSGNANSSSSAAASSKPGEKGDVGGGGGGGGSSNAGGG         | 180 |
| Sbjct      | 121 | ADYPDYKYRPRKKVKSGNA--GAGSAATAKPGEKGDVAGS-----SGHAGSSHAGGG    | 171 |
| Query      | 181 | GGGASGGGANSKPAQKKSCGSKVAGGAGGGVSKPHAKLILAGGGGGKAAAAAASF AAE  | 240 |
| Sbjct      | 172 | AGG-----SSKPAPKSCGPKV---AGSSVGKPHAKLV-----PAGGSKAAASF SPE    | 215 |
| Query      | 241 | QAGAAALLPLGAAADHHSLYKARTPSASASASSAASASAALAAPGKHLAEKKVKRVYLF  | 300 |
| Sbjct      | 216 | Q---AALLPLG---EPTAVYKVRTPSAATPAAS--SSPSALATPAKHPADKKVKRVYLF  | 268 |
| Query      | 301 | GLGTSSSPVGGVAGADPSDPLGLYEEEGAGCSPDAPSLSGRSSAASSPAAGRSPADHRG  | 360 |
| Sbjct      | 269 | SLGASASPVGGLGASADPSDPLGLYEDGGPGCSPDGRSLSGRSSAASSPAASRSPADHRG | 328 |
| Query      | 361 | YASLRAASPAPSSAPSHASSASSSSSSSSSSSSDDEFEDLLDLNPSSNFESMSLG      | 420 |
| Sbjct      | 329 | YASLRAASPAPSSAPSHASSLSS--SSSSSGSSSSDDEFEDLLDLNPSSNFESMSLG    | 386 |
| Query      | 421 | SFSSSSALDRDLDFNFEPGSGSHFEPDYCTPEVSEMISSGDWLESSISNLVFTY       | 474 |
| Sbjct      | 387 | SFSSSSALDRDLDFNFEPGSGSHFEPDYCTPEVSEMISSGDWLESSISNLVFTY       | 440 |

HMG

TAD

**Supplementary Figure 6.** Highly conserved similarity of Sox4 in humans and mice. Sox4 conserves high similarity especially in the N-terminus domain, HMG domain and TAD between humans and mice.

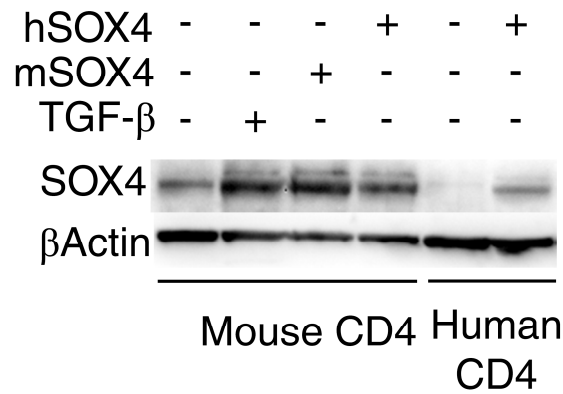

**Supplementary Figure 7.** Protein levels of Sox4 in mouse CD4<sup>+</sup> T cells. Mouse CD4<sup>+</sup> T cells were cultured with TCR stimulation in the presence or absence of TGF- $\beta$  stimulation or lentiviral transduction of mouse Sox4 or human Sox4 as in figure 4d. As control, human naïve CD4<sup>+</sup> T cells without or with transduction of human Sox4 were also investigated. Sox4-transduced mouse and human CD4<sup>+</sup> T cells were sorted as YFP<sup>+</sup> cells. Expression of mouse or human Sox4 proteins were visualized by immunoblotting with antibodies harboring reactivity against both human and mouse. TGF- $\beta$  stimulation and lentiviral transduction of mouse or human Sox4 in mouse CD4<sup>+</sup> T cells induced SOX4 expression comparable with the level in human Sox4-transduced human CD4<sup>+</sup> T cells which show CXCL13 induction as in figure 3.



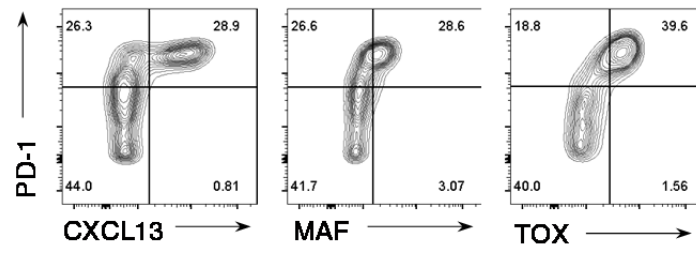

**Supplementary Figure 8.** RA synovial PD-1<sup>hi</sup>CD4<sup>+</sup> T cells preferentially express MAF and TOX. Representative density plots of RA synovial fluid CD4<sup>+</sup> T cells stained with anti-PD-1, CXCL13, MAF or TOX antibodies. PD-1<sup>hi</sup> cells preferentially express CXCL13, MAF and TOX.

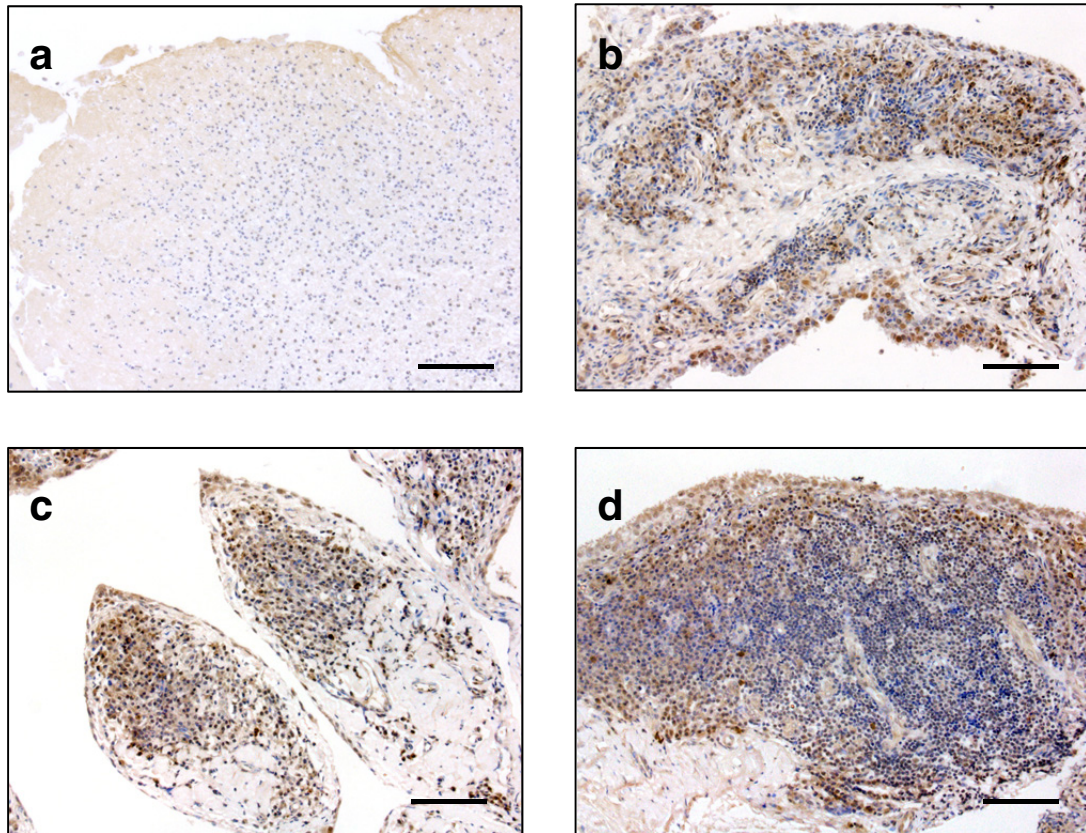

**Supplementary Figure 9.** Immunohistochemical staining with Sox4 antibody of RA synovial tissues. **a–d** Representative staining patterns of Sox4 in RA synovium. Sox4 (brown) and hematoxylin (blue). **a** A representative sample with moderate diffuse cell infiltration without ELS formation. Sox4<sup>+</sup> cells are not detectable. **b** A representative sample with moderate cell infiltration that forms mild nodule-like structures in sublining layer. Sox4 was preferentially expressed in nodule-like structures. **c** A representative sample with severe cell infiltration with ELS formation in villous hypertrophy of synovium. **d** A representative sample with severe cell infiltration with ELSs. Scale bars: 100  $\mu$ m.

**a**

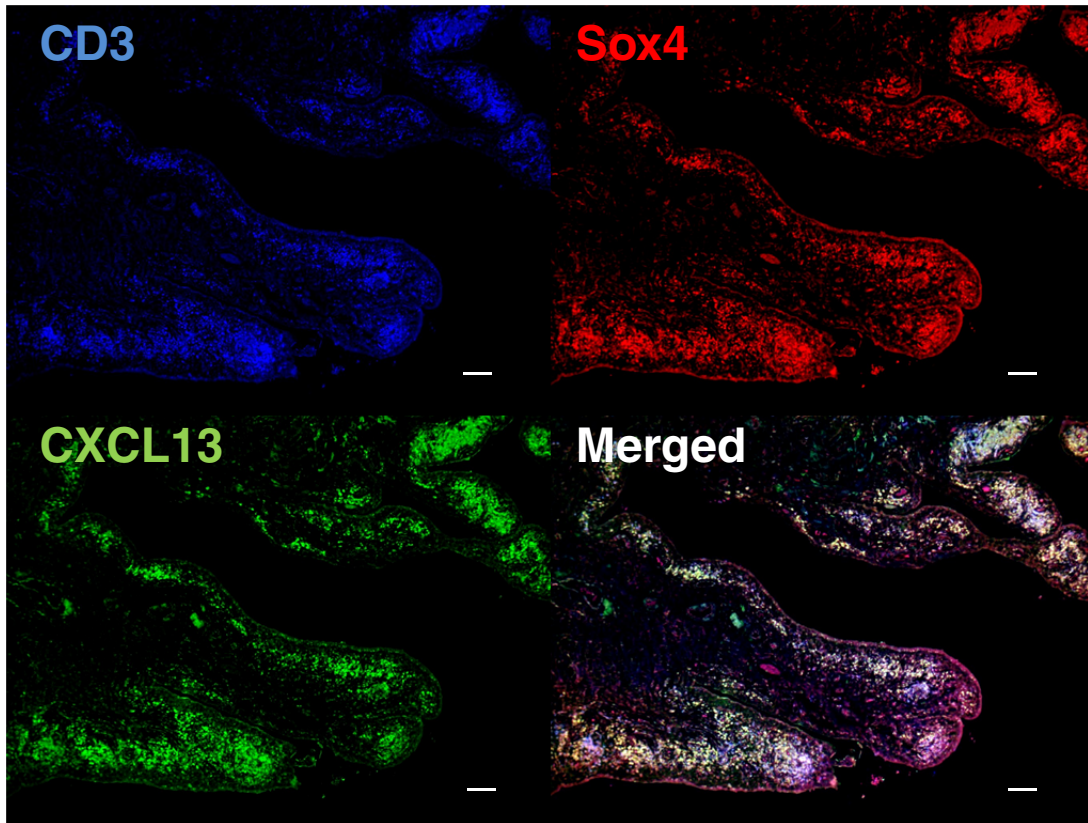

**b**

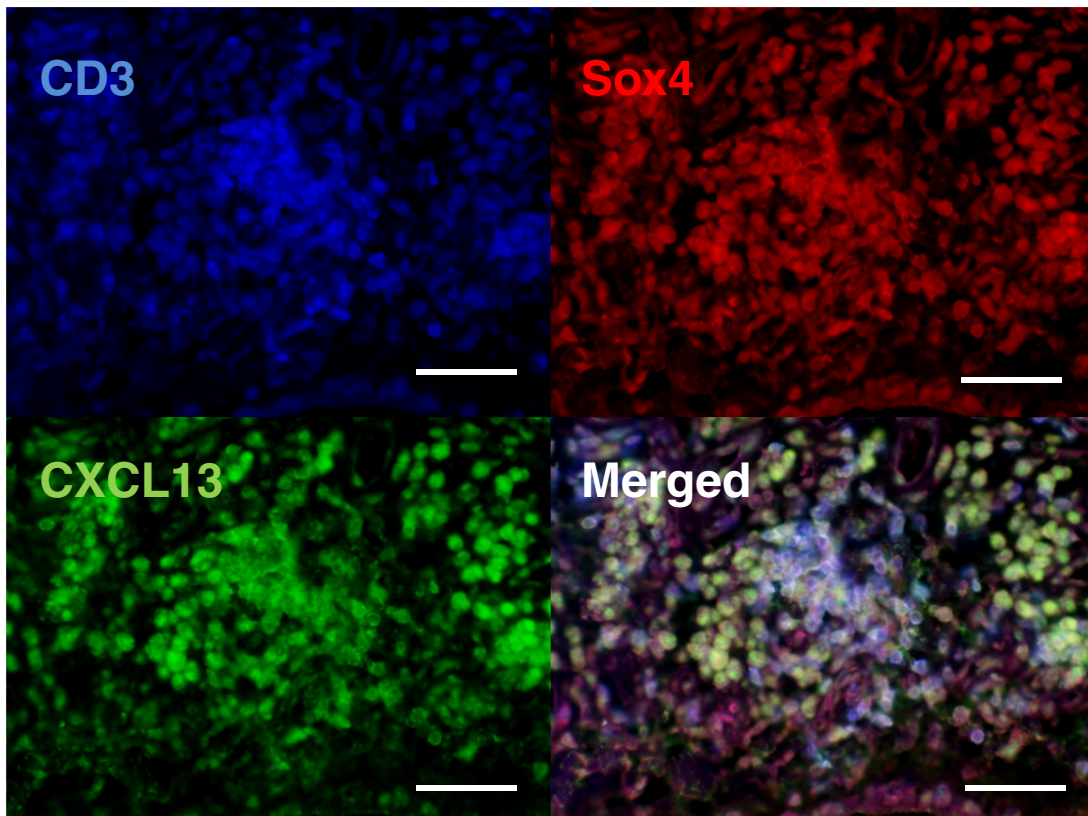

**C**

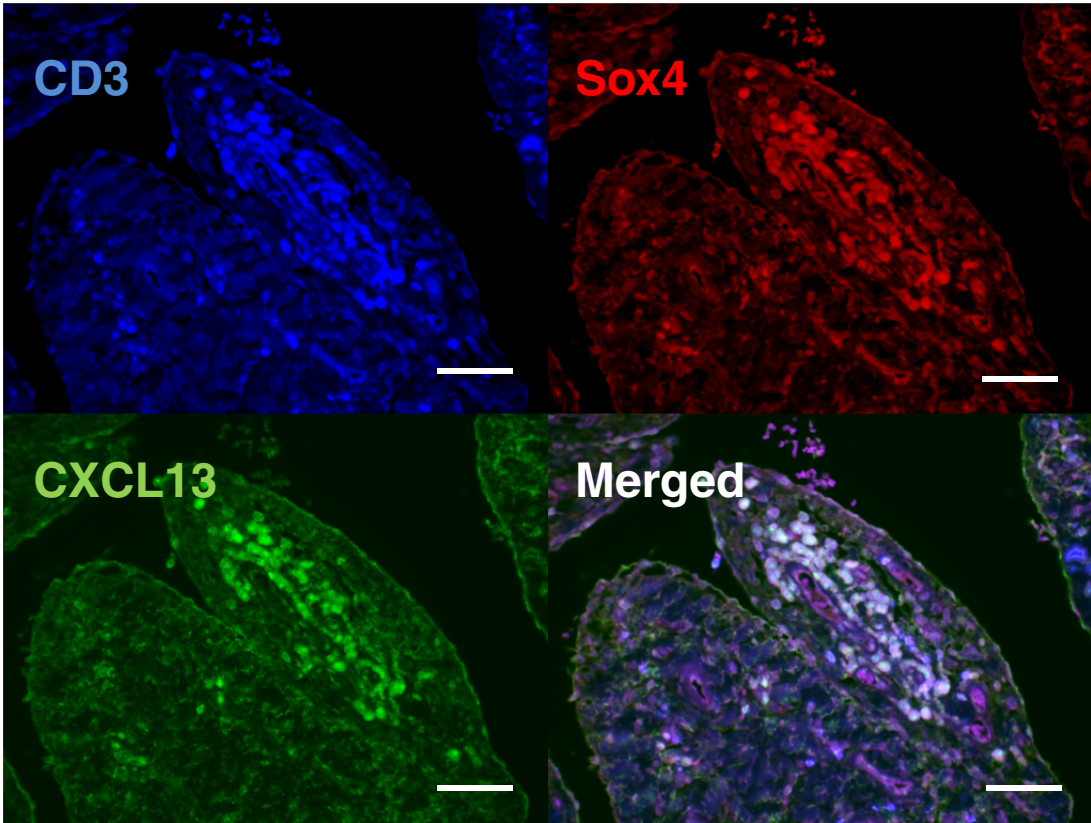

d

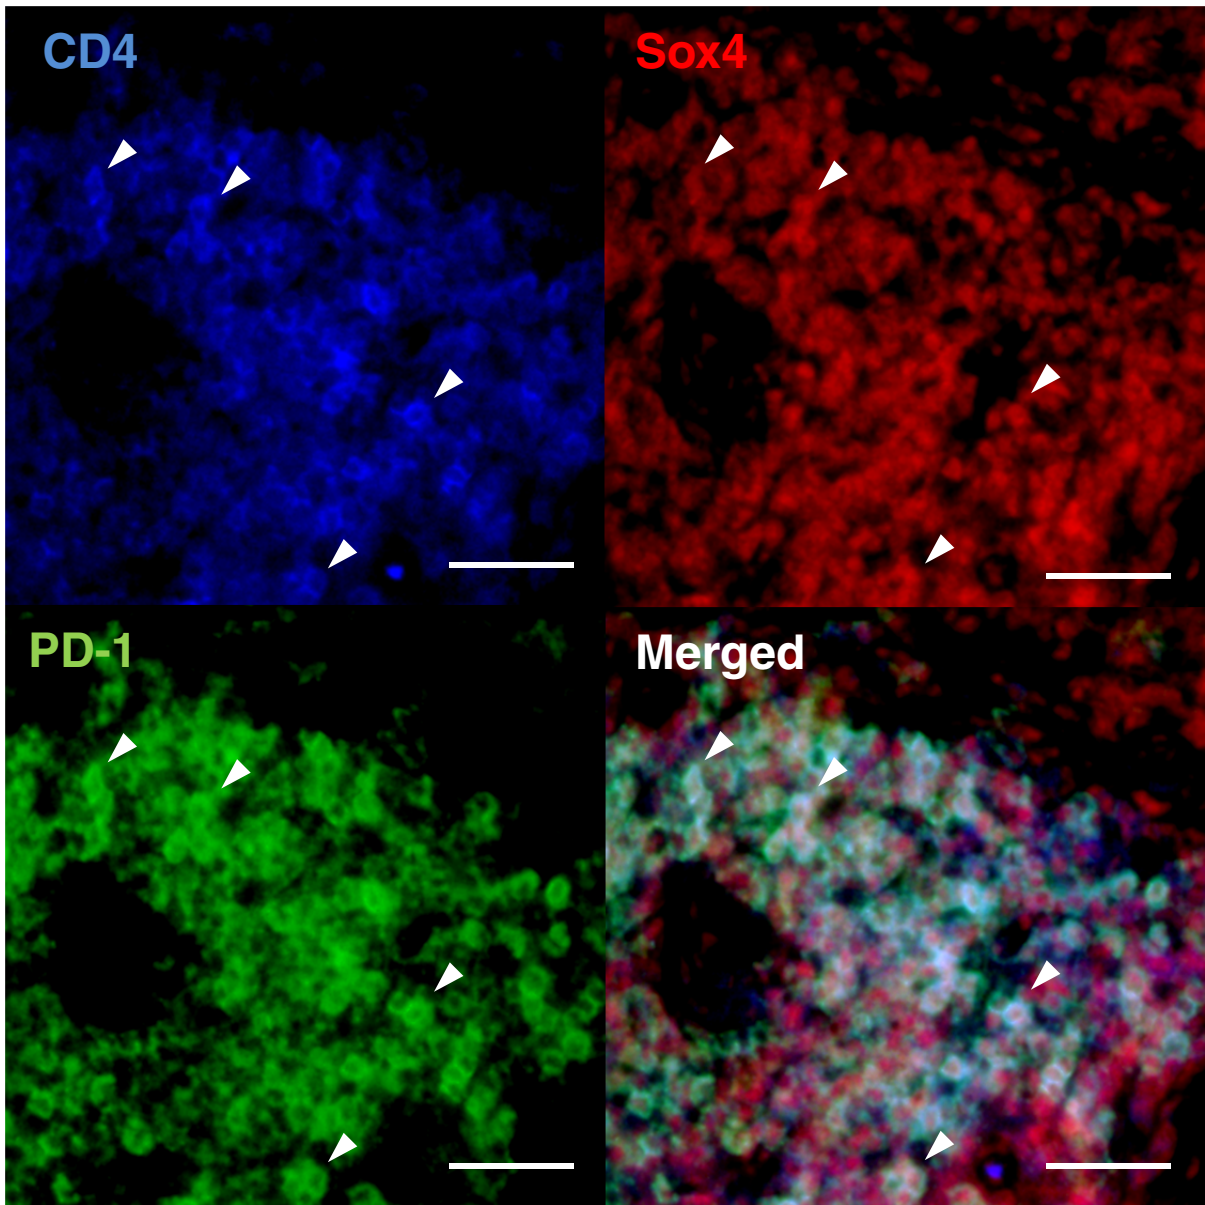

**e**

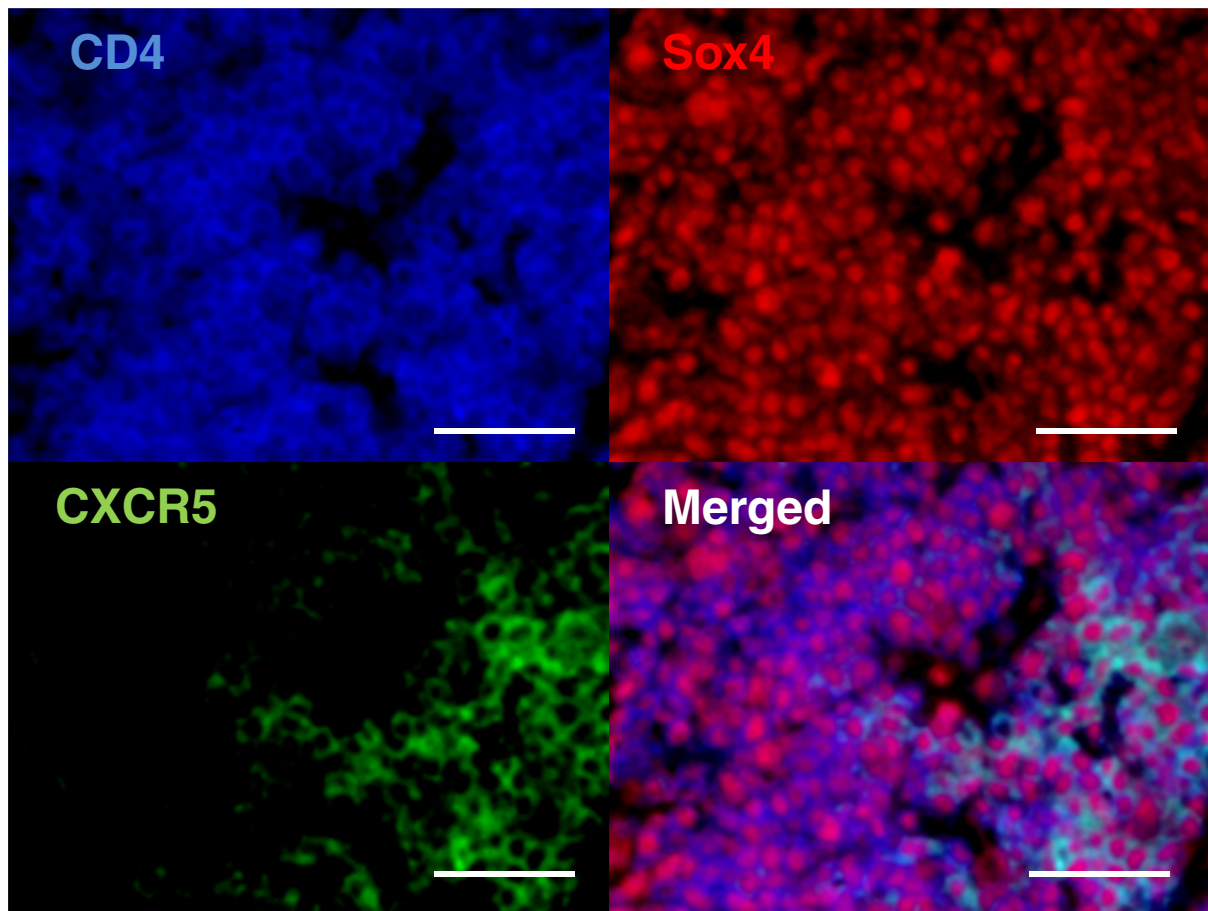

**Supplementary Figure 10.** Triple immunostaining of RA synovial tissues. **a–c** Stainings of CXCL13 (Green), Sox4 (Red), and CD3 (Blue). **a** A representative sample with moderate cell infiltration in sublining layer accompanied with moderate ELS formation. Sox4<sup>+</sup> cells are present in both areas with diffuse cell infiltration and with ELS formation. Scale bars: 100  $\mu$ m. **b** A representative sample with mild ELS formation. Scale bars: 50 $\mu$ m. **c** A representative sample of villous hyperplasia. Scale bars: 50  $\mu$ m. **d** Staining of PD-1 (Green), Sox4 (red) and CD4 (Blue). Arrowheads indicate representative PD-1<sup>hi</sup>CD4<sup>+</sup>Sox4<sup>+</sup> cells. Scale Bars: 50 $\mu$ m. **e** Staining of CXCR5 (Green), Sox4 (red) and CD4 (Blue). Scale Bars: 50 $\mu$ m.

Supplementary Figure 11. Full images of Immunoblots

Fig. 2d SOX4

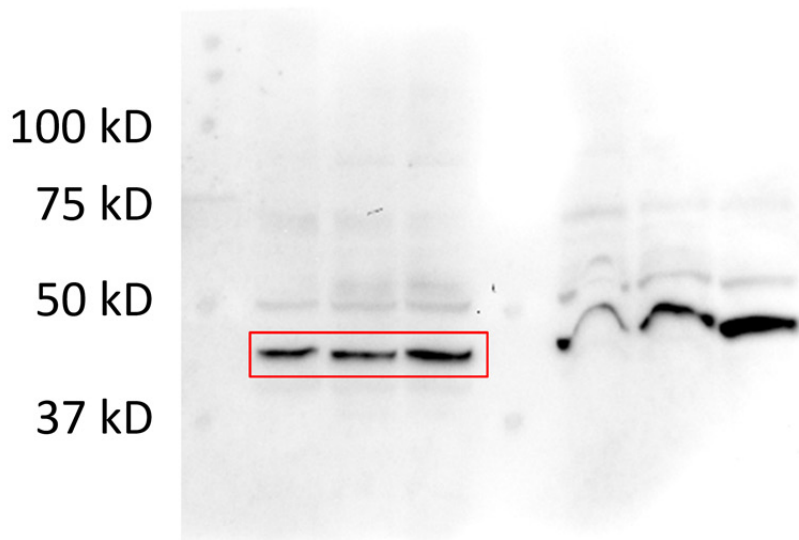

Fig. 2d ACTB

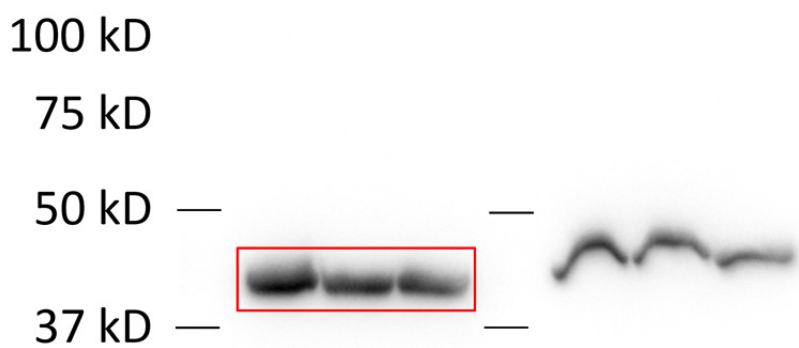

## Supplementary Tables

Supplementary Table 1. Expressions of genes relating to Tfh cells, PD-1<sup>hi</sup>CXCR5<sup>+</sup>CD4<sup>+</sup> T cells of RA, and/or Th17 cells

| Probe Set ID | Gene Symbol | Entrez Gene | FC (TGFβ + IL-1β vs IL-12) | FC (TGFβ + IL-6 vs IL-12) |
|--------------|-------------|-------------|----------------------------|---------------------------|
| 205242_at    | CXCL13      | 10563       | 32.0                       | 38.2                      |
| 203140_at    | BCL6        | 604         | -1.4                       | -1.5                      |
| 215990_s_at  | BCL6        | 604         | -1.4                       | -1.5                      |
| 228758_at    | BCL6        | 604         | -2.7                       | -2.8                      |
| 207607_at    | ASCL2       | 430         | 1.0                        | -1.3                      |
| 229215_at    | ASCL2       | 430         | 1.0                        | 1.0                       |
| 205965_at    | BATF        | 10538       | -1.5                       | 1.4                       |
| 206363_at    | MAF         | 4094        | 1.9                        | 5.4                       |
| 209348_s_at  | MAF         | 4094        | 2.7                        | 3.3                       |
| 1566324_a_at | MAF         | 4094        | 3.0                        | 3.1                       |
| 209347_s_at  | MAF         | 4094        | 3.7                        | 2.0                       |
| 1566323_at   | MAF         | 4094        | 1.1                        | 1.2                       |
| 204529_s_at  | TOX         | 9760        | 2.6                        | 6.3                       |
| 204530_s_at  | TOX         | 9760        | 1.2                        | 2.1                       |
| 217192_s_at  | PRDM1       | 639         | 1.3                        | -1.2                      |
| 235668_at    | PRDM1       | 639         | 1.2                        | -1.1                      |
| 228964_at    | PRDM1       | 639         | 4.0                        | -1.1                      |
| 206126_at    | CXCR5       | 643         | -2.3                       | -1.2                      |
| 216734_s_at  | CXCR5       | 643         | -1.4                       | -1.2                      |
| 210439_at    | ICOS        | 29851       | -1.4                       | -1.5                      |
| 207634_at    | PDCD1       | 5133        | 1.0                        | 1.0                       |
| 207892_at    | CD40LG      | 959         | -1.8                       | -1.8                      |
| 209582_s_at  | CD200       | 4345        | 1.6                        | 1.1                       |
| 209583_s_at  | CD200       | 4345        | 1.6                        | 1.0                       |
| 240070_at    | TIGIT       | 201633      | 2.6                        | 3.4                       |
| 211211_x_at  | SH2D1A      | 4068        | 2.6                        | 3.1                       |
| 211209_x_at  | SH2D1A      | 4068        | 2.8                        | 3.0                       |
| 211210_x_at  | SH2D1A      | 4068        | 2.7                        | 3.0                       |
| 210116_at    | SH2D1A      | 4068        | 2.4                        | 2.9                       |
| 230391_at    | CD84        | 8832        | 3.0                        | 2.2                       |
| 211188_at    | CD84        | 8832        | -1.4                       | -2.1                      |
| 205988_at    | CD84        | 8832        | 1.7                        | 1.5                       |
| 244352_at    | CD84        | 8832        | 1.6                        | 1.4                       |
| 211192_s_at  | CD84        | 8832        | 1.7                        | 1.4                       |
| 211190_x_at  | CD84        | 8832        | 1.7                        | 1.3                       |
| 211189_x_at  | CD84        | 8832        | 1.7                        | 1.2                       |
| 211191_at    | CD84        | 8832        | 1.1                        | -1.2                      |
| 1552497_a_at | SLAMF6      | 114836      | 1.3                        | -1.0                      |
| 206181_at    | SLAMF1      | 6504        | -1.8                       | -1.6                      |
| 1555626_a_at | SLAMF1      | 6504        | -1.5                       | -1.4                      |
| 239427_at    | SLAMF1      | 6504        | -1.1                       | 1.0                       |
| 221271_at    | IL21        | 59067       | -11.4                      | -20.2                     |
| 206978_at    | CCR2        | 729230      | 5.5                        | 4.1                       |
| 207794_at    | CCR2        | 729230      | 1.9                        | 1.5                       |
| 200839_s_at  | CTSB        | 1476        | -1.5                       | -2.0                      |
| 200838_at    | CTSB        | 1476        | -1.5                       | -1.9                      |
| 213275_x_at  | CTSB        | 1476        | -1.2                       | 1.6                       |
| 227961_at    | CTSB        | 1476        | -1.6                       | 1.5                       |
| 213274_s_at  | CTSB        | 1476        | -1.5                       | -1.1                      |



Supplementary Table 1. Continued

| Probe Set ID | Gene Symbol | Entrez Gene | FC (TGF $\beta$ + IL-1 $\beta$ vs IL-12) | FC (TGF $\beta$ + IL-6 vs IL-12) |
|--------------|-------------|-------------|------------------------------------------|----------------------------------|
| 206419_at    | RORC        | 6097        | 1.2                                      | 1.2                              |
| 228806_at    | RORC        | 6097        | 2.1                                      | 1.9                              |
| 210426_x_at  | RORA        | 6095        | 1.1                                      | 1.2                              |
| 210479_s_at  | RORA        | 6095        | 1.1                                      | 1.2                              |
| 226682_at    | RORA        | 6095        | 1.7                                      | 1.7                              |
| 235567_at    | RORA        | 6095        | 1.5                                      | 1.6                              |
| 236266_at    | RORA        | 6095        | 2.7                                      | 3.5                              |
| 240951_at    | RORA        | 6095        | 1.0                                      | 1.4                              |
| 216876_s_at  | IL17A       | 3605        | 2.0                                      | 4.3                              |
| 234408_at    | IL17F       | 112744      | -1.0                                     | -1.0                             |
| 221165_s_at  | IL22        | 50616       | -4.6                                     | -4.5                             |
| 222974_at    | IL22        | 50616       | -51.2                                    | -30.7                            |
| 1552912_a_at | IL23R       | 149233      | -1.4                                     | -3.7                             |
| 1561853_a_at | IL23R       | 149233      | -1.2                                     | -2.9                             |

Supplementary Table 2. Candidate genes that fulfilled the criteria

| Probe Set ID | Gene Symbol          | Entrez Gene  | FC (TGF- $\beta$ +IL-1 $\beta$ vs IL-12) | FC (TGF- $\beta$ +IL-6 vs IL-12) | Localization        |
|--------------|----------------------|--------------|------------------------------------------|----------------------------------|---------------------|
| 219529_at    | CLIC3                | 9022         | 14.7                                     | 12.9                             | Nucleus             |
| 218318_s_at  | NLK                  | 51701        | 4.3                                      | 6.4                              | Nucleus             |
| 201416_at    | SOX4                 | 6659         | 4.6                                      | 4.9                              | Nucleus             |
| 201417_at    | SOX4                 | 6659         | 6.9                                      | 6.8                              | Nucleus             |
| 202087_s_at  | CTSL                 | 1514         | 24.2                                     | 43.0                             | Cytoplasm           |
| 228739_at    | CYS1                 | 192668       | 21.8                                     | 20.6                             | Cytoplasm           |
| 206588_at    | DAZL                 | 1618         | 18.6                                     | 45.3                             | Cytoplasm           |
| 215017_s_at  | FNBP1L               | 54874        | 17.1                                     | 26.6                             | Cytoplasm           |
| 225700_at    | GLCCI1               | 113263       | 4.5                                      | 4.8                              | Cytoplasm           |
| 1560316_s_at | GLCCI1               | 113263       | 4.2                                      | 4.9                              | Cytoplasm           |
| 205466_s_at  | HS3ST1               | 9957         | 7.7                                      | 19.1                             | Cytoplasm           |
| 227889_at    | LPCAT2               | 54947        | 10.0                                     | 27.9                             | Cytoplasm           |
| 227556_at    | NME7                 | 29922        | 16.6                                     | 20.7                             | Cytoplasm           |
| 213010_at    | PRKCDBP              | 112464       | 7.8                                      | 11.9                             | Cytoplasm           |
| 217762_s_at  | RAB31                | 11031        | 12.2                                     | 5.4                              | Cytoplasm           |
| 217763_s_at  | RAB31                | 11031        | 10.0                                     | 4.2                              | Cytoplasm           |
| 217764_s_at  | RAB31                | 11031        | 15.4                                     | 7.8                              | Cytoplasm           |
| 209324_s_at  | RGS16                | 6004         | 4.9                                      | 4.0                              | Cytoplasm           |
| 209325_s_at  | RGS16                | 6004         | 6.2                                      | 5.1                              | Cytoplasm           |
| 204067_at    | SUOX                 | 6821         | 10.6                                     | 13.0                             | Cytoplasm           |
| 1553030_a_at | SUOX                 | 6821         | 4.5                                      | 4.4                              | Cytoplasm           |
| 204604_at    | CDK14                | 5218         | 4.6                                      | 6.8                              | Cytoplasm           |
| 201525_at    | APOD                 | 347          | 8.3                                      | 6.8                              | Extracellular Space |
| 205229_s_at  | COCH                 | 1690         | 12.0                                     | 5.9                              | Extracellular Space |
| 213428_s_at  | COL6A1               | 1291         | 7.5                                      | 12.2                             | Extracellular Space |
| 205242_at    | CXCL13               | 10563        | 30.6                                     | 38.1                             | Extracellular Space |
| 226847_at    | FST                  | 10468        | 11.8                                     | 9.4                              | Extracellular Space |
| 243110_x_at  | NPW                  | 283869       | 8.1                                      | 8.2                              | Extracellular Space |
| 211756_at    | PTHLH                | 5744         | 4.6                                      | 5.9                              | Extracellular Space |
| 206310_at    | SPINK2               | 6691         | 10.7                                     | 12.8                             | Extracellular Space |
| 213994_s_at  | SPON1                | 10418        | 16.3                                     | 12.9                             | Extracellular Space |
| 201506_at    | TGFBI                | 7045         | 16.8                                     | 44.0                             | Extracellular Space |
| 223502_s_at  | TNFSF13B             | 10673        | 21.0                                     | 21.3                             | Extracellular Space |
| 207426_s_at  | TNFSF4               | 7292         | 14.6                                     | 33.9                             | Extracellular Space |
| 227233_at    | TSPAN2               | 10100        | 6.2                                      | 5.3                              | Extracellular Space |
| 227236_at    | TSPAN2               | 10100        | 5.8                                      | 5.7                              | Extracellular Space |
| 1563445_x_at | CTSLP8               | 1518         | 8.8                                      | 9.1                              | Other               |
| 208029_s_at  | LAPTM4B              | 55353        | 5.9                                      | 8.0                              | Other               |
| 208767_s_at  | LAPTM4B              | 55353        | 5.9                                      | 7.5                              | Other               |
| 214039_s_at  | LAPTM4B              | 55353        | 5.6                                      | 6.9                              | Other               |
| 1554679_a_at | LAPTM4B              | 55353        | 7.2                                      | 8.6                              | Other               |
| 230650_at    | SLCO5A1              | 81796        | 14.0                                     | 28.1                             | Other               |
| 213851_at    | TMEM110              | 375346       | 4.4                                      | 6.5                              | Other               |
| 235079_at    | ZNF704               | 619279       | 4.1                                      | 4.4                              | Other               |
| 202391_at    | BASP1                | 10409        | 14.5                                     | 35.0                             | Other               |
| 219010_at    | C1orf106             | 55765        | 7.9                                      | 13.5                             | Other               |
| 227966_s_at  | CCDC74A//C<br>CDC74B | 90557//91409 | 4.0                                      | 5.3                              | Other               |
| 214079_at    | DHRS2                | 10202        | 10.8                                     | 24.8                             | Other               |

Supplementary Table 2. Continued

| Probe Set ID | Gene Symbol | Entrez Gene | FC (TGF- $\beta$ +IL-1 $\beta$ vs IL-12) | FC (TGF- $\beta$ +IL-6 vs IL-12) | Localization    |
|--------------|-------------|-------------|------------------------------------------|----------------------------------|-----------------|
| 1554918_a_at | ABCC4       | 10257       | 9.0                                      | 7.7                              | Plasma Membrane |
| 201242_s_at  | ATP1B1      | 481         | 21.9                                     | 34.5                             | Plasma Membrane |
| 201243_s_at  | ATP1B1      | 481         | 14.7                                     | 24.7                             | Plasma Membrane |
| 231873_at    | BMPR2       | 659         | 5.8                                      | 5.5                              | Plasma Membrane |
| 203065_s_at  | CAV1        | 857         | 9.8                                      | 15.0                             | Plasma Membrane |
| 212097_at    | CAV1        | 857         | 20.6                                     | 44.8                             | Plasma Membrane |
| 204440_at    | CD83        | 9308        | 5.5                                      | 10.4                             | Plasma Membrane |
| 201131_s_at  | CDH1        | 999         | 4.8                                      | 9.0                              | Plasma Membrane |
| 226189_at    | ITGB8       | 3696        | 9.5                                      | 20.9                             | Plasma Membrane |
| 229461_x_at  | NEGR1       | 257194      | 21.9                                     | 33.3                             | Plasma Membrane |
| 221796_at    | NTRK2       | 4915        | 7.6                                      | 24.2                             | Plasma Membrane |
| 210830_s_at  | PON2        | 5445        | 4.5                                      | 8.2                              | Plasma Membrane |
| 209611_s_at  | SLC1A4      | 6509        | 6.5                                      | 6.2                              | Plasma Membrane |
| 225688_s_at  | PHLDB2      | 90102       | 5.0                                      | 5.5                              | Plasma Membrane |
| 207536_s_at  | TNFRSF9     | 3604        | 4.9                                      | 4.5                              | Plasma Membrane |
| 211786_at    | TNFRSF9     | 3604        | 6.3                                      | 5.6                              | Plasma Membrane |
| 210643_at    | TNFSF11     | 8600        | 9.2                                      | 10.5                             | Plasma Membrane |
| 235438_at    |             |             | 4.3                                      | 6.2                              |                 |

Supplementary Table 3. Clinical characteristics of RA participants

| Donors of paired blood and synovial CD4 <sup>+</sup> T cells                                                                                                                                                                                                                                       |            |
|----------------------------------------------------------------------------------------------------------------------------------------------------------------------------------------------------------------------------------------------------------------------------------------------------|------------|
| Number of participants                                                                                                                                                                                                                                                                             | 14         |
| Gender, male/female                                                                                                                                                                                                                                                                                | 4/10       |
| Age (year)                                                                                                                                                                                                                                                                                         | 67.8±9.6   |
| Disease Duration (years)                                                                                                                                                                                                                                                                           | 14.4±10.6  |
| Positive RF, n (%)                                                                                                                                                                                                                                                                                 | 13 (92.9%) |
| Positive ACPA, n (%)                                                                                                                                                                                                                                                                               | 12 (85.7%) |
| ESR, mm/hour                                                                                                                                                                                                                                                                                       | 38.8±24.2  |
| C-reactive protein, mg/liter                                                                                                                                                                                                                                                                       | 18.2±23.0  |
| DAS28, Average                                                                                                                                                                                                                                                                                     | 4.77±1.15  |
| Medication, n (%)                                                                                                                                                                                                                                                                                  | 10 (100%)  |
| Steroid                                                                                                                                                                                                                                                                                            | 4 (28.6%)  |
| Synthetic DMARDs                                                                                                                                                                                                                                                                                   | 13 (92.9%) |
| Biologics                                                                                                                                                                                                                                                                                          | 6 (42.9%)  |
| Totally 10 samples of synovial fluid and 5 samples of synovial tissue were investigated. Both synovial fluid and synovial tissue were available from one participant, whose data of peripheral blood CD4 <sup>+</sup> T cells was used in both comparisons for synovial fluid and synovial tissue. |            |
| Paraffin-embedded RA synovial tissues                                                                                                                                                                                                                                                              |            |
| Number of samples                                                                                                                                                                                                                                                                                  | 14         |
| Gender, male/female                                                                                                                                                                                                                                                                                | 2/12       |
| Age (year)                                                                                                                                                                                                                                                                                         | 58.8±17.0  |
| Disease Duration (years)                                                                                                                                                                                                                                                                           | 13.0±13.3  |
| Positive RF, n (%)                                                                                                                                                                                                                                                                                 | 12 (85.7%) |
| Positive ACPA, n (%)                                                                                                                                                                                                                                                                               | 11 (78.6%) |
| ESR, mm/hour                                                                                                                                                                                                                                                                                       | 46.9±30.3  |
| C-reactive protein, mg/liter                                                                                                                                                                                                                                                                       | 20.7±20.6  |
| DAS28, Average                                                                                                                                                                                                                                                                                     | 4.01±1.39  |
| Medication, n (%)                                                                                                                                                                                                                                                                                  | 13 (92.9%) |
| Steroid                                                                                                                                                                                                                                                                                            | 6 (42.9%)  |
| Synthetic DMARDs                                                                                                                                                                                                                                                                                   | 11 (78.6%) |
| Biologics                                                                                                                                                                                                                                                                                          | 6 (42.9%)  |

SD, standard deviation; RF, rheumatoid factor; ACPA, anti-citrullinated protein antibody; ESR, erythrocyte sedimentation ratio; DAS28, 28-joint Disease Activity Score, DMARDs, Disease Modifying Anti-rheumatic Drugs.

Age, ESR, C-reactive protein and DAS28 are shown as mean±SD.
